# Supplementary material
Source: PubMed Central journal article supplement (PMC2919913)
Supplement: 1008382107_pnas.201008382SI.pdf [file 1008382107_pnas.201008382SI.pdf]

# Supporting Information

Wang et al. 10.1073/pnas.1008382107

## SI Methods

**Tissue Fixation.** Adult rats, mice, and *Oprd1* exon 1-deleted mice (Jackson Lab) were anesthetized and perfused with 20 mL of warm saline, followed by a warm mixture of 4% paraformaldehyde and 0.1% picric acid in 0.1 M phosphate buffer (pH 7.4) and then the same but ice-cold fixative (50 mL). The lumbar segments of the spinal cord and DRGs were dissected out and postfixed in the same fixative for 90 min at 4 °C.

**Gene Transfection in DRG Neurons.** Dissociated DRG neurons were transfected with pCMV-Myc-DOR1 or DOR1-EGFP in pEGFP-N3 by electroporation with Nucleofector II (Amaxa) using Neuron Nucleofector Solution and program O-003 and were then plated on coverslips in DMEM containing 10% (vol/vol) FBS. After 6 h, neurons were cultured in the medium containing 50% (vol/vol) DMEM, 50% (vol/vol) F12, 1% N2, and 100 ng/mL NGF for small neurons or 50 ng/mL NT3 for large neurons for 48–72 h.

**Whole-Cell Patch-Clamp Recording.** The composition of the pipette solution was 120 mM CsCl, 1 mM MgCl<sub>2</sub>, 10 mM Hepes, 10 mM EGTA, 4 mM Mg-ATP, and 0.3 mM Na-GTP (pH 7.2, 300 mOsm). Cells were kept in Tyrode's solution containing 135 mM NaCl, 2.5 mM KCl, 4 mM CaCl<sub>2</sub>, 2 mM MgCl<sub>2</sub>, 10 mM D-glucose, and 10 mM Hepes (pH 7.4, 300 mOsm) until the whole-cell configuration was achieved. The external solution was then exchanged with the Ba<sup>2+</sup>-containing solution, referred to as Ba-solution, containing 5 mM BaCl<sub>2</sub>, 150 mM N-methyl-D-glucamine, 2 mM MgCl<sub>2</sub>, 10 mM D-glucose, and 10 mM Hepes (pH 7.4, 300 mOsm), while holding the cell at -70 mV. The drug stock solutions were diluted in Ba-solution before use. Effects of agonists on barium currents flowing through Ca<sup>2+</sup> channels were measured on current waveforms activated by 100- or 200-ms command pulses to 0 mV from a holding potential of -70 mV and recorded with a MutiClamp-700B amplifier (Molecular Devices). The data were quantified off-line using custom-made software by measuring the peak current amplitude of the depolarizing test pulses.

**Whole-Cell Recording in Spinal Cord Slice.** Transverse slices (~600 μm) of L4 and L5 spinal cord segments with an attached dorsal root from adult rats were prepared with a vibrating microslicer and perfused in oxygen-bubbled Krebs' solution (117 mM NaCl, 3.6 mM KCl, 2.5 mM CaCl<sub>2</sub>, 1.2 mM MgCl<sub>2</sub>, 1.2 mM NaH<sub>2</sub>PO<sub>4</sub>, 25 mM NaHCO<sub>3</sub>, and 11 mM D-glucose) for blind whole-cell recording (1). Resistance of patch pipettes was typically 4–10 MΩ. The pipette solution contained 135 mM K-gluconate, 0.5 mM CaCl<sub>2</sub>, 2 mM MgCl<sub>2</sub>, 5 mM KCl, 5 mM EGTA, 5 mM Hepes, and 5 mM D-glucose. Currents were filtered at 2 kHz and digitized at 5 kHz using the Axopatch 200B (Molecular Devices) and were analyzed by pCLAMP8.5 (Molecular Devices) at a holding potential of -70 mV. Amplitude of mEPSCs was analyzed with an Axograph (Molecular Devices). Dorsal root stimulation, which was sufficient to recruit C-fibers, was delivered with a suction electrode linked to a constant-current stimulator (Electronic Stimulator; Nihon Kohpen). Afferent C-fibers were identified by their estimated evoked EPSC latency at 0.9 ± 0.5 m/s (range: 0.3–1.5 m/s).

**Electric Stimulation, Cell Surface Biotinylation, and Immunoblotting.** Neurons from L4 and L5 DRGs were cultured in the medium containing an equal volume of DMEM and F12 medium with 1% N2 for 3 d. Cells were stimulated by 10-Hz electric stimulation with platinum wires contacting the culture medium. Each stimulation pulse (0.5 ms, 8–10 V) was sufficient to elicit action potential. Cells were stimulated for 5 min. Surface protein biotinylation was performed after 5-min electrical stimulation by incubating cultured neurons with Sulfo-NHS-LC-Biotin (0.5 mg/mL; Pierce) for 60 min at 4 °C. Cells were then processed for precipitation of biotinylated proteins with ImmunoPure Immobilized Streptavidin (Pierce) and immunoblotting with DOR antibodies (1:3,000; Neuromics) and actin (1:10,000; Santa Cruz). The intensity of DOR bands was normalized to actin.

1. Nakatsuka T, Park JS, Kumamoto E, Tamaki T, Yoshimura M (1999) Plastic changes in sensory inputs to rat substantia gelatinosa neurons following peripheral inflammation. *Pain* 82:39–47.









**Table S1. Primers for PCR experiments and probes for in situ hybridization**

| No. | Gene                        | Primer name       | Primer sequence                     | Product length, bp |
|-----|-----------------------------|-------------------|-------------------------------------|--------------------|
| 1   | <i>OPRD1</i> (NM_013622)    | OPRD1-F           | 5'-GTGCAAGGCTGTGCTCTCCATTG-3'       | 770                |
|     |                             | OPRD1-R           | 5'-GTCGGGTAGGTCAGGCGGCAGCGCCACCG-3' |                    |
| 2   | <i>OPRM1</i> (NM_001039652) | OPRM1-F           | 5'-ATGGACAGCAGCGCCGGCCC-3'          | 1,317              |
|     |                             | OPRM1-R           | 5'-TCACCTGCCAAGCTGGCCTTC-3'         |                    |
| 3   | <i>PPT-A</i> (NM_009311)    | PPT-A-F           | 5'-ATGAAAATCCTCGTGG-3'              | 393                |
|     |                             | PPT-A-R           | 5'-TTATTTACGTCTTCTTC-3'             |                    |
| 4   | <i>GAPDH</i> (NM_008084)    | GAPDH-F           | 5'-TGCTGAGTATGTCGTGGAG-3'           | 555                |
|     |                             | GAPDH-R           | 5'-TAGCCCAAGATGCCCTTCAGT-3'         |                    |
| 5   | <i>OPRD1</i> (NM_013622)    | OPRD1-F           | 5'-ATGGAGCTGGTCCCTCTG-3'            |                    |
|     |                             | OPRD1-F           | 5'-TCCAGAGCGCCAAGTACTTG-3'          |                    |
|     |                             | OPRD1-R           | 5'-TCAGGCGGCAGCGCCACCG-3'           |                    |
| 6   | <i>OPRD1</i> (NM_013622)    | OPRD1-F           | 5'-GTGCAAGGCTGTGCTCTCCATTG-3'       | 770                |
|     |                             | OPRD1-R           | 5'-GTCGGGTAGGTCAGGCGGCAGCGCCACCG-3' |                    |
| 7   | <i>OPRD1</i> (NM012617)     | OPRD1-F           | 5'-GTGCAAGGCTGTGCTCTCCATTG-3'       | 770                |
|     |                             | OPRD1-R           | 5'-GCCGGGTAGGTCAGGCGGCAGCGCCACCG-3' |                    |
| 8   | <i>OPRD1</i> (NM_013622)    | OPRD1-F1          | 5'-TTCTGGGCAACGTGCTCGTC-3'          | 510                |
|     |                             | OPRD1-R1          | 5'-CATAGCACACCGTGATGATG-3'          |                    |
|     |                             | OPRD1-F2          | 5'-TGTTGGCATCGTCCGGTAC-3'           |                    |
| 9   | <i>OPRM1</i> (NM_001039652) | OPRD1-R2          | 5'-TGAAGCCAAGACCCAGATGC-3'          | 320                |
|     |                             | OPRM1-F1          | 5'-GTATCTTCACCCCTCTGCACC-3'         |                    |
|     |                             | OPRM1-R1          | 5'-AGGCAATGCAGAAGTGCCAG-3'          |                    |
| 10  | <i>PPT-A</i> (NM_009311)    | OPRM1-F2          | 5'-AGGCCCTGGATTTCCGTACC-3'          | 272                |
|     |                             | OPRM1-R2          | 5'-CATGCGGACACTCTTGAGTC-3'          |                    |
|     |                             | PPT-A-F1          | 5'-ATGAAAATCCTCGTGGCCGT-3'          |                    |
| 11  | $\beta$ -Actin (X03672)     | PPT-A-R1          | 5'-CTTTCGTAGTTCTGCATCGC-3'          | 380                |
|     |                             | PPT-A-F2          | 5'-CCACTCAACTGTTTGACAGAG-3'         |                    |
|     |                             | PPT-A-R2          | 5'-GCTCTTTTGCCCATAGTCC-3'           |                    |
| 11  | $\beta$ -Actin (X03672)     | $\beta$ -Actin-F1 | 5'-GCCAACCGTGAAAAGATGAC-3'          | 556                |
|     |                             | $\beta$ -Actin-R1 | 5'-GCACTGTGTTGGCATAGAGG-3'          |                    |
|     |                             | $\beta$ -Actin-F2 | 5'-GGCTGTGCTGTCCCTGTATG-3'          |                    |
|     |                             | $\beta$ -Actin-R2 | 5'-GGCTGTGCTGTCCCTGTATG-3'          |                    |

Nucleotide sequence of PCR primers is listed with reference to corresponding GenBank accession numbers. Primers 1–4 were used in PCR of three subsets of DRG neurons, primer 5 was used in PCR of *Oprd1* exon 1-deleted mice, primers 6 and 7 were used for probes in situ hybridization, and primers 8–11 were used in single-cell PCR. F: forward; R: reverse. F1 and R1 and F2 and R2 primer pairs were used in the first- and second-round single-cell PCR assays. For each primer pair, forward and reverse primers are located in different exons to avoid the amplification of genomic DNA.
